# Supplementary material for: Cocoa Extract Provides Protection against 6-OHDA Toxicity in SH-SY5Y Dopaminergic Neurons by Targeting PERK
Source: MDPI journal article supplement (doi:10.3390/biomedicines10082009), 2022-08-18
Supplement: s1 [file s1]

## Supplementary Materials: Supplementary Information

**Table S1.** Identification of phytochemical compounds in cocoa extract.

| Peak | Tentative Identification                | Molecular Formula                                           | Ionization Mode      | [M-H] ( <i>m/z</i> ) | MS/MS ( <i>m/z</i> )                   | Error (ppm) |
|------|-----------------------------------------|-------------------------------------------------------------|----------------------|----------------------|----------------------------------------|-------------|
| 1    | Theobromine                             | C <sub>7</sub> H <sub>8</sub> N <sub>4</sub> O <sub>2</sub> | [M-H] <sup>+</sup>   | 181.0742             | 167.0102                               | 0.80        |
| 2    | Catechin-3- <i>O</i> -hexoside          | C <sub>21</sub> H <sub>24</sub> O <sub>11</sub>             | [M-H] <sup>-</sup>   | 451.1245             | 289.0710; 245.0818                     | -3.76       |
| 3    | <i>N</i> -Caffeoyl- <i>L</i> -aspartate | C <sub>13</sub> H <sub>13</sub> NO <sub>7</sub>             | [M-H] <sup>-</sup>   | 294.0619             | 179.0367; 276.0452                     | -2.82       |
| 4    | Procyanidin B-type                      | C <sub>30</sub> H <sub>26</sub> O <sub>12</sub>             | [M-H] <sup>-</sup>   | 577.1330             | 407.0740; 425.0839; 289.0688           | 0.87        |
| 5    | Epicatechin                             | C <sub>15</sub> H <sub>14</sub> O <sub>6</sub>              | [M-H] <sup>-</sup>   | 289.0706             | 245.0806; 205.0709                     | -3.81       |
| 6    | Procyanidin B-type trimer               | C <sub>45</sub> H <sub>38</sub> O <sub>18</sub>             | [M-H] <sup>-</sup>   | 865.1984             | 577.1331; 407.0753; 289.0675           | -0.23       |
| 7    | Procyanidin B-type tetramer             | C <sub>60</sub> H <sub>50</sub> O <sub>24</sub>             | [M-2H] <sup>-2</sup> | 576.1240             | 289.0719; 739.1666                     | -0.17       |
| 8    | Procyanidin B-type tetramer (isomer)    | C <sub>60</sub> H <sub>50</sub> O <sub>24</sub>             | [M-2H] <sup>-2</sup> | 576.1240             | 289.0719; 739.1666                     | -0.17       |
| 9    | Procyanidin B-type pentamer             | C <sub>75</sub> H <sub>62</sub> O <sub>30</sub>             | [M-2H] <sup>-2</sup> | 720.1569             | 289.06841; 407.0857                    | -0.95       |
| 10   | Procyanidin B-type hexamer              | C <sub>79</sub> H <sub>78</sub> O <sub>44</sub>             | [M-2H] <sup>-2</sup> | 864.1880             | 577.1302; 425.0808; 407.0757; 287.0537 | 1.85        |
| 11   | Procyanidin A-type hexoside             | C <sub>36</sub> H <sub>34</sub> O <sub>17</sub>             | [M-H] <sup>-</sup>   | 737.1704             | 611.1376; 449.0839                     | -2.58       |
| 12   | Quercetin 3- <i>O</i> -arabinoside      | C <sub>20</sub> H <sub>18</sub> O <sub>11</sub>             | [M-H] <sup>-</sup>   | 433.0733             | 301.0654; 271.8139                     | -2.93       |

### Section S1. Quantitative Analysis

Theobromine was selected as external standard. Stock solution (1 mg/mL) was prepared in ethanol and the calibration curve was obtained in a concentration range of 10–200 µg/mL, with five concentration levels and triplicate injections of each level were run. Peak areas were plotted against corresponding concentrations. The amount of the theobromine in the sample was expressed as milligram per gram of extract.
